# Supplementary material for: Increasing Lifestyle Walking by 3000 Steps per Day Reduces Blood Pressure in Sedentary Older Adults with Hypertension: Results from an e-Health Pilot Study
Source: MDPI journal article supplement (doi:10.3390/jcdd10080317), 2023-07-27

# The 3Ps of the 3K study

*"Inspiration is what gets you started. Habit is what keeps you going!"*

## Plan

Walk whenever you can:

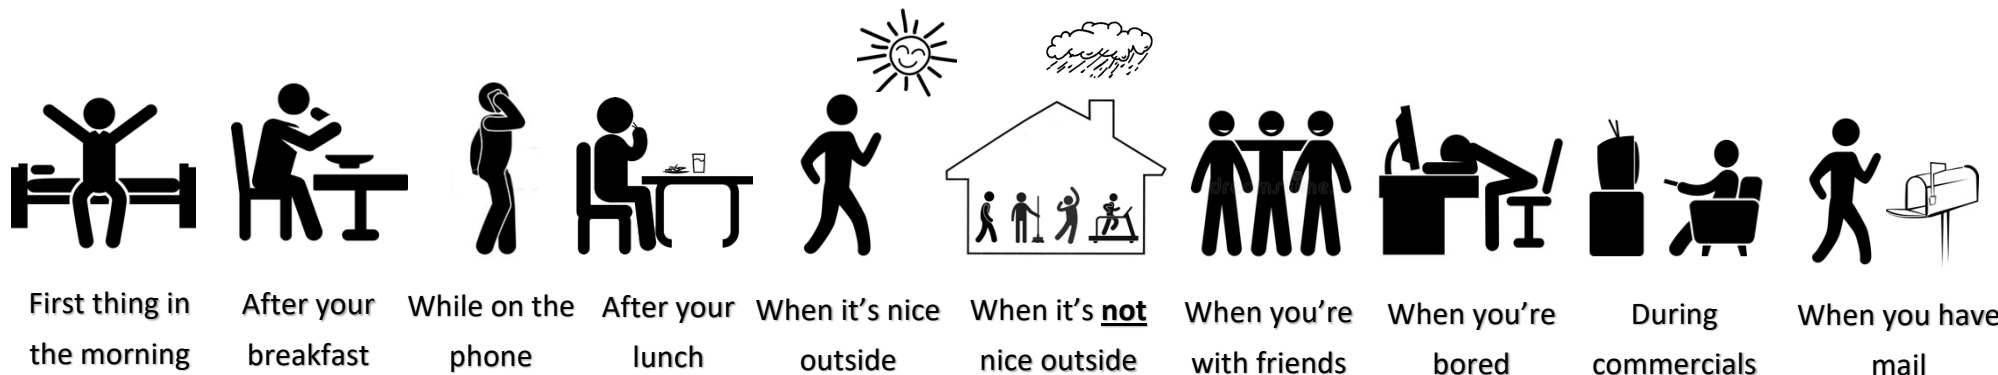

## Place

Walk wherever there is space:

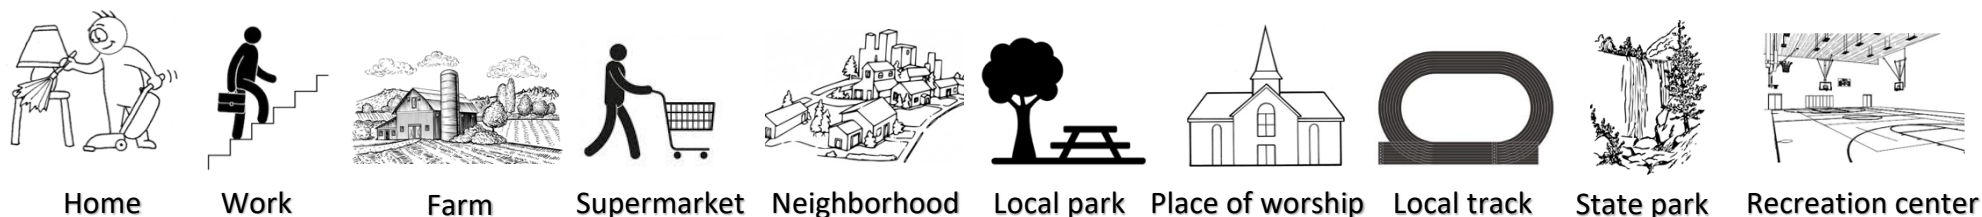

## Play

Find ways to make walking meaningful to you:

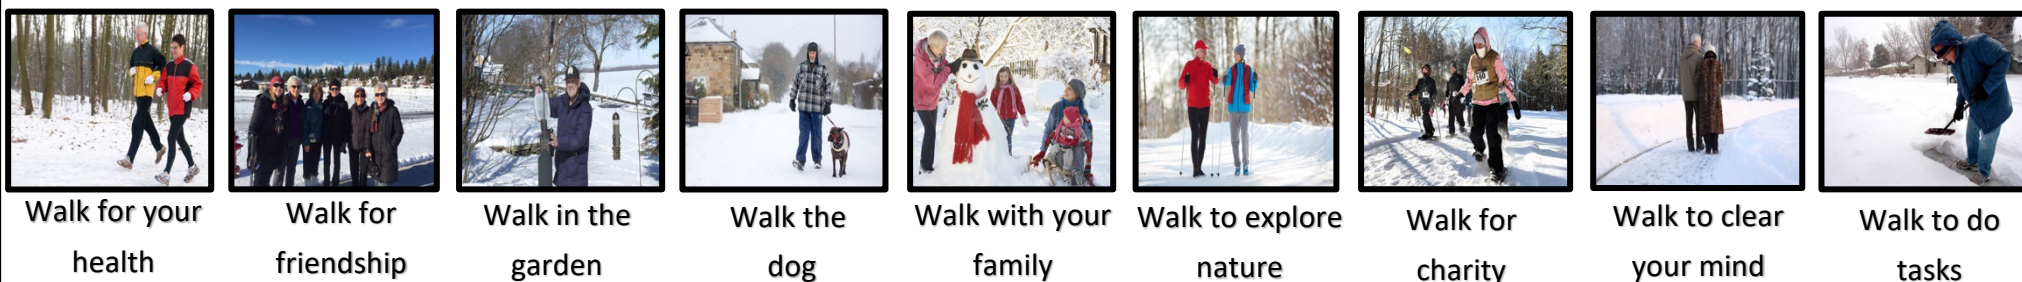

Supplement: s1 [file s1]
