# Supplementary material for: Increasing Lifestyle Walking by 3000 Steps per Day Reduces Blood Pressure in Sedentary Older Adults with Hypertension: Results from an e-Health Pilot Study
Source: MDPI journal article supplement (doi:10.3390/jcdd10080317), 2023-07-27
Supplement: s1 [file s1]

# Baseline Participant Characteristics by HAPA group

| Characteristic                 | All         | Control     | HAPA        | p-value |
|--------------------------------|-------------|-------------|-------------|---------|
| n                              | 21          | 11          | 10          |         |
| Age, yrs                       | 73 ± 5      | 73 ± 5      | 74 ± 5      | 0.67    |
| Female, n (%)                  | 13 (62)     | 6 (55)      | 7 (70)      | 0.47    |
| Height, cm                     | 167.6 ± 8.9 | 166.6 ± 9.0 | 167.5 ± 8.5 | 0.83    |
| Weight, kg                     | 85.9 ± 13.9 | 85.3 ± 8.4  | 86.6 ± 18.7 | 0.83    |
| BMI, kg/m <sup>2</sup>         | 30.7 ± 4.2  | 30.8 ± 3.5  | 30.7 ± 5.0  | 0.94    |
| Steps, steps/day               | 3899 ± 2198 | 4194 ± 2371 | 3575 ± 2064 | 0.53    |
| Systolic blood pressure, mmHg  | 137 ± 10    | 136 ± 12    | 137 ± 7     | 0.76    |
| Diastolic blood pressure, mmHg | 81 ± 6      | 80 ± 7      | 82 ± 5      | 0.40    |
| Resting heart rate, bpm        | 70 ± 7      | 69 ± 6      | 72 ± 7      | 0.29    |
| Medication Usage, n (%)        |             |             |             |         |
| Anti-hypertensive              | 8 (39)      | 5 (45)      | 3 (30)      | 0.46    |
| Statin                         | 9 (43)      | 5 (45)      | 4 (40)      | 0.80    |

Data presented mean ± standard deviation or n (%). BMI, body mass index; HAPA, Health Action Process Approach.

# Change in steps, systolic, and diastolic blood pressure across intervention by HAPA group.

|                                |             | Baseline    | 10 Weeks    | 20 Weeks | p-value |        |                        |
|--------------------------------|-------------|-------------|-------------|----------|---------|--------|------------------------|
|                                |             |             |             |          | Group   | Time   | GroupxTime Interaction |
| Steps, steps/day               |             |             |             |          | 0.59    | <0.001 | 0.58                   |
| Control                        | 4194 ± 2371 | 6852 ± 3103 | 5836 ± 2684 |          |         |        |                        |
| HAPA                           | 3575 ± 2064 | 6179 ± 2179 | 5879 ± 2062 |          |         |        |                        |
| Systolic Blood Pressure, mmHg  |             |             |             |          | 0.99    | <0.001 | 0.73                   |
| Control                        | 136 ± 12    | 133 ± 13    | 130 ± 13    |          |         |        |                        |
| HAPA                           | 137 ± 7     | 132 ± 13    | 129 ± 10    |          |         |        |                        |
| Diastolic Blood Pressure, mmHg |             |             |             |          | 0.43    | 0.02   | 0.55                   |
| Control                        | 80 ± 7      | 77 ± 8      | 77 ± 5      |          |         |        |                        |
| HAPA                           | 82 ± 5      | 81 ± 7      | 78 ± 8      |          |         |        |                        |

Data presented mean ± standard deviation
